1 **Exploring variations in the implementation of a health system level policy intervention to**  
2 **improve maternal and child health outcomes in resource limited settings: A qualitative**  
3 **multiple case study from Uganda**

4  
5 **Variations in the implementation of a health system level policy intervention in Uganda**

6 David Roger Walugembe<sup>1,2</sup>, Katrina Plamondon<sup>2</sup>, Frank Kaharuza<sup>3</sup>, Peter Waiswa<sup>3</sup>, Lloy Wylie<sup>4</sup>, Nadine  
7 Wathen<sup>5</sup>, Anita Kothari<sup>6</sup>

8

9 1. Faculty of Medicine

10 Department of Anesthesiology, Pharmacology & Therapeutics

11 The University of British Columbia,

12 Vancouver, BC Canada V5Z 1M9

13 [david.walugembe@ubc.ca](mailto:david.walugembe@ubc.ca)

14 Tel: 519 317-8481

15

16 2. Faculty of Health and Social Development,

17 School of Nursing

18 The University of British Columbia, Okanagan Campus

19 Kelowna, BC, Canada, V1V 1V7

20

21 3. Makerere University School of Public Health

22 P.O. Box 7072,

23 Kampala, Uganda

24

25 4. Schulich Interfaculty Program in Public Health

26 Department of Psychiatry, Pathology and Health Sciences

27 Western University

28 1465 Richmond St.

29 London, ON, Canada N6G 2M1

30

31 5. Arthur Labatt Family School of Nursing

32 FIMS & Nursing Building

33 Western, University

34 London, Ontario, Canada, N6A 5B9

35

36 6. School of Health Studies

37 Arthur and Sonia Labatt Health Sciences Building

38 Western, University

39 London, Ontario, Canada, N6A 5B9

40

41 **Contact information of the corresponding author**

42 David Roger Walugembe, PhD

43 E-mail: [dwalugembe@gmail.com/david.walugembe@ubc.ca](mailto:dwalugembe@gmail.com/david.walugembe@ubc.ca)

44 Tel: 519 317 8481

45 **Authors' contributions**

46 DRW, AK conceived the study. DRW, AK, NW, LW, FK, PW contributed to its design. DRW  
47 developed the data collection tools, collected and analyzed the data under the supervision of AK.  
48 DRW prepared the manuscript. AK, NW, LW, KP, FK, PW and DRW reviewed and edited the  
49 manuscript. All authors read and approved the final manuscript.

50

51

52 **Exploring variations in the implementation of a health system level policy intervention to**  
53 **improve maternal and child health outcomes in resource limited settings: A qualitative**  
54 **multiple case study from Uganda**

55 **Abstract**

56 **Background**

57 Despite growing literature, few studies have explored the implementation of policy interventions to  
58 reduce maternal and perinatal mortality in low- and middle-income countries (LMICs). Even fewer  
59 studies explicitly articulate the theoretical approaches used to understand contextual influences on policy  
60 implementation. This under-use of theory may account for the limited understanding of the variations in  
61 implementation processes and outcomes. We share findings from a study exploring how a health system-  
62 level policy intervention was implemented to improve maternal and child health outcomes in a resource  
63 limited LMIC.

64 **Methods**

65 Our qualitative multiple case study was informed by the Normalization Process Theory (NPT). It was  
66 conducted across eight districts and among ten health facilities in Uganda, with 48 purposively selected  
67 participants. These included health care workers located at each of the case sites, policy makers from the  
68 Ministry of Health, and from agencies and professional associations. Data were collected using semi-  
69 structured, in-depth interviews to understand uptake and use of Uganda's maternal and perinatal death  
70 surveillance and response (MPDSR) policy and were inductively and deductively analyzed using NPT  
71 constructs and subconstructs.

72 **Results**

73 We identified six broad themes that may explain the observed variations in the implementation of the  
74 MPDSR policy. These include: 1) perception of the implementation of the policy, 2) leadership of the  
75 implementation process, 3) structural arrangements and coordination, 4) extent of management support  
76 and adequacy of resources, 5) variations in appraisal and reconfiguration efforts and 6) variations in  
77 barriers to implementation of the policy.

78

79 **Conclusion and recommendations**

80 The variations in sense making and relational efforts, especially perceptions of the implementation  
81 process and leadership capacity, had ripple effects across operational and appraisal efforts. Adopting  
82 theoretically informed approaches to assessing the implementation of policy interventions is crucial,  
83 especially within resource limited settings.

84

85 **Key Words**

86 Implementation, Normalization Process Theory, Maternal Health, Perinatal Health, Mortality,  
87 Surveillance, Response, Health Policy, Uganda, Health System

88 **Introduction**

89 **Implementation of policy intervention to improve maternal and child health outcomes in resource**  
90 **limited settings**

91 Ending preventable maternal and perinatal mortality is a global priority under the Sustainable  
92 Development Goals - 2030 agenda (1). The specific aim is to reduce the average global Maternal  
93 Mortality Ratio to less than 70 maternal deaths per 100,000 live births and neonatal mortality to at least  
94 12 deaths per 1000 live births by 2030 (1-3). Across low- and middle-income countries (LMICs), several  
95 interventions have been implemented to reduce maternal and perinatal mortality and improve health  
96 outcomes for mothers and babies. Despite the growing literature exploring implementation of these  
97 interventions and strategies, few studies have specifically focused on the implementation of policy  
98 interventions in these contexts (4-19). Studies that have explored the implementation of non-policy  
99 interventions and strategies may be useful in understanding contextual influences on implementation of  
100 policy related interventions to improve maternal and child health (20-30).

101  
102 Failure to achieve the Millennium Development Goals in many LMICs was attributed in large part to the  
103 inability to implement maternal and child health policies (12, 20, 31-33). Previous studies have attempted  
104 to explore perceived challenges to implementing maternal and child health strategies, such as the World  
105 Health Organization maternal health guidelines to improve maternal and child care (7, 12, 14, 17, 19).  
106 These guidelines, which address common challenges, include: augmentation of labour, induction of labor,  
107 prevention and treatment of postpartum hemorrhage and treatment of pre-eclampsia and eclampsia,  
108 breastfeeding, maternal and perinatal health guidelines, safe childhood checklist and task shifting in  
109 maternal and new born health (7, 14, 19, 34, 35).

110  
111 **Use of theoretical approaches to study implementation of interventions to improve maternal and**  
112 **child health outcomes**

113 While theory is an important contributor towards understanding the challenges to implementing  
114 maternal/child health guidelines and policies, few studies explicitly articulate their theoretical approaches  
115 (36, 37). This may account for our limited understanding of the observed variations in implementation as  
116 well as their reported minimal impact in reducing maternal and perinatal mortality and morbidity (10, 38-  
117 41). Theoretical approaches provide a better understanding and explanation of how and why  
118 implementation succeeds or fails (10, 42-44). Additionally, the use of theory to study the implementation  
119 of interventions offers generalizable frameworks that can apply across differing settings and individuals  
120 and the opportunity for incremental accumulation of knowledge as well as explicit frameworks for  
121 analysis (42, 45-48). Helfrich et al. observe that using theory not only enhances understanding of barriers  
122 to implementation but may enhance the ability to design, and improve implementation processes (47).

123

124 Following a review of implementation science theories, models and frameworks, (42, 44), this study used  
125 the Normalization Process Theory (NPT) to explore what explains the variations in the implementation of  
126 MPDSR policy among selected health facilities in Uganda. As explained in detail elsewhere (49, 50),  
127 NPT combines the merits of multiple theoretical approaches with potential to offer a more complete  
128 understanding of certain aspects of implementation (51). Its intent, level of abstraction, evidence of  
129 utilization in previous empirical studies, provision of how-to support tools and dual purpose as a theory  
130 and evaluation framework made it well-suited to the objectives of this study (43, 52-55).

131

### 132 **About Maternal Perinatal Death Surveillance and Response (MPDSR) Policy**

133 A maternal/perinatal death audit/review is an in-depth systematic review of maternal/perinatal deaths to  
134 delineate their underlying health, social and other contributory factors, and the lessons learned from such  
135 an audit are used in making recommendations to prevent similar future deaths (56, 57). The WHO  
136 initiated the implementation of maternal and perinatal death reviews to go beyond the numbers captured  
137 by measures such as maternal mortality ratio (MMR) and infant mortality rate (IMMR) and facilitate  
138 understanding of the underlying reasons why women and their newborns die as well as devise  
139 contextually appropriate remedial actions (58, 59). Kinney et al. noted that the implementation of these  
140 strategies has evolved from clinical obstetric to maternal death reviews (MDRs) and/or perinatal death  
141 reviews (PDRs), Maternal Death Surveillance and Response (MDSR) and currently Maternal Perinatal  
142 Death Surveillance and Response (MPDSR) (10). Prior to 2012, much of the focus was on MDRs and/or  
143 PDRs. However, according to Smith et al. (2017), in 2012 the WHO and partners introduced the Maternal  
144 Death Surveillance and Response (MDSR) as a new approach aimed at collecting and using robust  
145 information for decision making (60). Additionally, Kinney et al. observe that the integration of the  
146 perinatal death element into the approach was first reported in 2016 (10).

147

148 If implemented properly, maternal and perinatal death surveillance and response policy can reduce  
149 maternal mortality by up to 35%, and perinatal mortality by 30% (10, 36, 56, 57, 61-68). However,  
150 despite recommendations by the WHO for its widespread implementation, there still exist variations in  
151 the implementation of MPDSR policy. For example, although 85% of LMICs have a national policy to  
152 review all maternal deaths, fewer than half are implementing MPDSR as per WHO guidelines (69). In a  
153 recent survey of health facilities in four African countries, Kinney et al. (2020) indicated that fewer than  
154 half could provide evidence on any changes resulting from the implementation of MPDSR (70).

155

### 156 **MPDSR Implementation in Uganda**

157 As of 2020, Uganda was categorized among the 33 countries with high or moderate maternal mortality  
158 rate ranging between 100 to 499 deaths per 100,000 live births (1), but recent reports indicate that  
159 Uganda has made commendable progress in reducing maternal and neonatal mortality rates. For example,

160 according to the 2022 Uganda Demographic Health Survey (UDHS), Uganda's maternal mortality rate is  
161 reported to have reduced from 336/100,000 live births to 189/100,000 live births and the neonatal  
162 mortality rate has also reduced from 27/1,000 live births to 22/1,000 live births (71). These gains have  
163 been partially attributed to the concerted efforts invested in the implementation of the MPDSR policy  
164 including collecting, reporting and analysing data on maternal and perinatal deaths. According to the  
165 MPDSR report for the year 2022/2023, strategies such as strengthening MPDSR coordination at the  
166 national and subnational levels, and the involvement of various stakeholders in responding to maternal  
167 and perinatal deaths were reported to have contributed to these successes (72).

168  
169 Nonetheless, the implementation of the MPDSR policy still varies across settings within Uganda's health  
170 care system (72-74), and there is little research on Uganda's implementation of the MPDSR policy (50,  
171 75-78), with very few of these studies explicitly articulating their theoretical approach (49, 50, 75).  
172 Thorsen et al. (2014) observe that studies have focused on the entirety of the MPDSR process with heavy  
173 emphasis on establishing a committee and implementing the recommendations as a way to institutionalize  
174 them. However, understanding the implementation of policy interventions such as MPDSR requires  
175 examining both the processes involved and how the intervention becomes workable and integrated into  
176 everyday work (53); there is a need to look at what people actually do and how they work. Embedding of  
177 a practice is dependent on organized and organizing agency (55) and requires continuous investment in  
178 sense-making, commitment, effort and appraisal of the routinization of a complex intervention (55). It is  
179 against this background that we selected NPT for our study, whose primary research question was "what  
180 explains the variations in the implementation of MPDSR policy among selected health facilities in  
181 Uganda?" while the secondary research questions was "how do the actors involved in the implementation  
182 of MPDSR policy understand and make sense of the policy (coherence), engage, and participate in its  
183 implementation (cognitive participation), distribute work and resources among themselves to  
184 operationalize it (collective action) and reflect or appraise the effects of implementing the policy  
185 (reflexive monitoring)?"

186

## 187 **Materials and Methods**

### 188 **Study design and setting**

189 This was a qualitative multiple case study informed by Stake (1995) and Merriam's (1998) approach to  
190 case study methodology (79, 80). We adopted a constructivist paradigm (81, 82) to explore participant  
191 understanding of what explains the variations in the implementation of the MPDSR policy in eight districts  
192 in Uganda and among ten health facilities (cases) that were selected to represent four out of the seven  
193 levels of the Uganda health care system (health center III, health center IV, general hospitals and regional  
194 referral hospitals) (Figure 1- Structure /Arrangement of the Uganda Healthcare System). These four levels  
195 of care were mandated by the Ministry of Health (MoH) to implement the MPDSR policy effective 2008

196 (74). Data were collected from 25 May 2018 and 30 March 2019. Sampling occurred at two levels:  
197 districts and cases within districts.

198

## 199 **Insert Figure 1: Structure /Arrangement of the Uganda Healthcare System**

200

### 201 **Selection of districts and cases**

202 The eight districts (refer to Table 1), were purposively selected for maximum variation to facilitate  
203 learning about a range of experiences MPDSR implementation (80). The selection of the districts was  
204 informed by reviewing performance trends in district league tables (83) published in the annual health  
205 sector performance reports (84). The reports also provided information on several health-related  
206 indicators, including the number of maternal and perinatal deaths per district local government from  
207 2003/2004 (83).

208

**Table 1: List of selected districts and number of cases per district**

| District  | Number of cases | Category          |
|-----------|-----------------|-------------------|
| Butambala | 2               | Bottom Performing |
| Jinja     | 1               | Top Performing    |
| Kabarole  | 1               | Top Performing    |
| Kampala   | 1               | Top Performing    |
| Kasese    | 1               | Top Performing    |
| Kibaale   | 1               | Bottom Performing |
| Mityana   | 2               | Top Performing    |
| Mubende   | 1               | Bottom Performing |

209

210 An initial six cases (D002, D003, D004, D005, D006, D008) were purposively selected from Jinja,  
211 Butambala, Mpigi, Mubende, Kibaale and Kabarole districts. At the recommendation of the MoH  
212 technical experts in charge of implementing the MPDSR policy, two cases (coded as D001 and D007)  
213 were added. These were selected from Kampala and Kasese district and represented the private-not-for  
214 profit sector. According to the technical experts, the inclusion of cases from this sector would enrich this  
215 study and would facilitate comparison between the initially selected cases, which were all government-  
216 funded health facilities. Since the two added cases were based in comparatively varying settings, that is  
217 urban (capital city) and rural, the decision to include both of them in the study was also aimed at  
218 understanding whether social contextual factors such as location contributed to implementation variations.  
219 Also, important to note is cases D052 and D062 (health center IIIs) were selected from within two  
220 districts (Mityana and Butambala) where two other cases representing a different level of care had  
221 previously been selected.

222

## 223 **Insert Figure 2: Selection of cases from top and bottom performing districts**

224

225 The selected districts consistently appeared among the 15 top (D001, D002, D005, D0052, D007, D008)  
226 and 15 bottom (D003, D004, D006, D0062) ranked local governments (performers) on the district league  
227 table. Matching a top with lower performing district was based on the level of care, volume of maternal  
228 deliveries conducted at each health facility as well as ownership of the health facilities. This same  
229 criterion was followed while selecting districts and cases representing other levels of care including  
230 general hospitals, health center IVs and IIIs (refer to Figure 2). Overall, 10 cases were selected based on  
231 their representativeness of the levels of care mandated by the MoH to implement the MPDSR (74). Health  
232 facilities with the highest volume of maternal deliveries per district were included in the study. This was  
233 informed by the assumption that those with the highest volumes were more likely to have higher maternal  
234 and or perinatal deaths thus making them suitable case(s) for the exploration of the study questions. The  
235 volume of maternal deliveries was ascertained from a review of the district health information system  
236 (DHIS2) maintained at the Ministry of Health resource center.

237

## 238 **Insert Figure 2: Selection of cases from top and bottom performing districts**

239

### 240 **Selection of study participants**

241 Study participants were purposively (85) selected from across the cases, the MoH, and from agencies and  
242 professional associations including the World Health Organization (WHO), United Nations Population  
243 Fund (UNFPA), Association of Obstetricians and Gynecologists of Uganda (AOGU), United States  
244 Agency for International Development (USAID) and the Uganda Health Service Commission (UHSC).  
245 The sampling was also informed by a review of existing documentation and input from technical experts.  
246 All study participants were involved or should have been involved in the implementation of the MPDSR  
247 policy (58). They were associated with a maternal and child health unit, department or national MPDSR  
248 committee and had worked in their current position for a period of not less than six months. This enabled  
249 them to suggest recommendations on strategies for addressing the causes of variations in implementation  
250 within their respective health facilities. Potential study respondents who were not in a position to discuss  
251 MPDSR policy or its implementation because of conflict of interest, or due to confidentiality agreements  
252 (n=2), were excluded.

253

### 254 **Data collection procedures**

255 In total, 48 people were interviewed, most at the respondent's place of work (n = 45). The semi-structured  
256 interviews lasted between 30 minutes -120 minutes. Interview guides (available on request) informed by  
257 the NPT constructs were used to guide the conduct of interviews with study participants (frontline health  
258 workers, administrative staff, representatives of agencies and professional associations and MoH staff)  
259 (52, 86, 87). After the first two interviews, the guide was adjusted to increase clarity and respond to



260 emerging findings (e.g., reflect language norms in context). With permission, interviews with study  
 261 participants were digitally recorded.

262

263 **Data analysis**

264 Interviews were transcribed, de-identified and archived in NVivo data management software. The first  
 265 author (DW) read and re-read each transcript multiple times, to generate the initial codes, search for  
 266 themes, and review, define and name them (88). As a means for organizing text for subsequent  
 267 interpretation, DW developed a codebook (Table 2) *a priori* informed by the NPT constructs and  
 268 subconstructs (52, 86). DW established how the emerging themes fit within the four major NPT  
 269 constructs and their respective sub-constructs which were then respectively entered into NVivo as parent  
 270 and child nodes. This process enabled the use of the theory to shape the potential interpretations of the  
 271 emerging findings. DW also compiled analytical notes on the observed similarities and differences in the  
 272 determinants of implementation of the MPDSR policy between the cases selected at each level of care and  
 273 later between top and bottom performing districts (refer to Table 3). This analysis resulted into the  
 274 identification of the broader themes that are presented below.

275

276 **Table 2: Codebook informed by NPT constructs and subconstructs**

| Name of code (Parent node/construct) | Name of the subcode (child node/subconstruct)                                                                                            | Explanation of the codes                                                                                                                                               |
|--------------------------------------|------------------------------------------------------------------------------------------------------------------------------------------|------------------------------------------------------------------------------------------------------------------------------------------------------------------------|
| Coherence                            | The sense-making work that people do individually and collectively to operationalize the implementation of MPDSR (sense-making efforts). |                                                                                                                                                                        |
|                                      | Differentiation                                                                                                                          | How implementing the MPDSR policy is different from other interventions aimed at improving maternal and child health.                                                  |
|                                      | Communal specification                                                                                                                   | How people working together build a shared understanding of the aims, objectives, and benefits of implementing MPDSR.                                                  |
|                                      | Individual specification                                                                                                                 | How participants collaboratively need to do things that will help them understand their specific tasks and responsibilities around the implementation of MPDSR policy. |
|                                      | Internalization                                                                                                                          | How participants in sense making undertake efforts to understand the value, benefits, and importance of implementing the MPDSR policy.                                 |
| Cognitive participation              | How people engage and participate in the implementation of MPDSR policy (relational efforts)                                             |                                                                                                                                                                        |
|                                      | Initiation                                                                                                                               | Whether or not the key participants are driving forward the implementation of MPDSR.                                                                                   |
|                                      | Enrolment                                                                                                                                | How participants organize and reorganize themselves in order to collectively contribute to the work involved in implementing the MPDSR policy.                         |
|                                      | Legitimation                                                                                                                             | Ensuring that other participants believe it is right for them to be involved, and that they can make a valid contribution.                                             |
|                                      | Activation                                                                                                                               | Actions and procedures needed to sustain implementation                                                                                                                |

| Name of code (Parent node/construct) | Name of the subcode (child node/subconstruct)                                                                                                            | Explanation of the codes                                                                                                                                                    |
|--------------------------------------|----------------------------------------------------------------------------------------------------------------------------------------------------------|-----------------------------------------------------------------------------------------------------------------------------------------------------------------------------|
|                                      |                                                                                                                                                          | of MPDSR policy as collectively defined by the participants.                                                                                                                |
| Collective Action                    |                                                                                                                                                          | Operational work that people do to enact MPDSR policy (operational efforts).                                                                                                |
|                                      | Interactional workability                                                                                                                                | Interactional work that people do with each other and with elements of implementation of MPDSR when they seek to operationalize it in everyday settings.                    |
|                                      | Relational Integration                                                                                                                                   | Knowledge work that people do to build accountability and maintain confidence in the implementation of MPDSR and in each other as they implement the policy.                |
|                                      | Skillset Workability                                                                                                                                     | Allocation of work that underpins the division of labour that is built up around implementation of MPDSR as it is operationalized in the real world.                        |
|                                      | Contextual Integration                                                                                                                                   | Resource work- managing implementation of MPDSR through the allocation of different kinds of resources and execution of protocols, policies, and procedures.                |
| Reflexive Monitoring                 | Appraisal work that people do to assess and understand the ways that MPDSR policy implementation affects them and those around them (appraisal efforts). |                                                                                                                                                                             |
|                                      | Systematization                                                                                                                                          | Determining the usefulness of implementing MPDSR for the participants and for the others and involves the work of collecting information in a variety of ways.              |
|                                      | Communal Appraisal                                                                                                                                       | Working together-sometimes in informal collaboratives, sometimes in informal groups to evaluate the worth of a set of practices.                                            |
|                                      | Individual Appraisal                                                                                                                                     | How individuals involved in the implementation of MPDSR work experientially as individuals to appraise its effects on them and the contexts in which they are set.          |
|                                      | Reconfiguration                                                                                                                                          | Whether appraisal work by individuals or groups leads to attempts to redefine procedures or modify practices and to event to change/update the MPDSR guidelines and policy. |

277

## 278 **Ethics approval and consent to participate**

279 Ethics approval for this study was sought from the Health Sciences Research Ethics Board (HSREB, IRB  
 280 00000940) Delegated Review of the University of Western Ontario. Additional ethical approval was  
 281 sought from the School of Medicine Research and Ethics Committee, Makerere University College of  
 282 Health Sciences (REC REF No. 2018-018), the Uganda National Council for Science and Technology  
 283 (HS 2393) and the Ugandan Ministry of Health (ADM 130/313/05). Participation in the study was  
 284 completely voluntary and written informed consent was sought at all times. Study participants were  
 285 assured of privacy and confidentiality and approved the use of information for improving public health,  
 286 clinical practices and policy implementation. The manuscript does not include details, images, or videos  
 287 relating to individual participants.

## 288 **Maintaining rigour**

289 Method and data source triangulation were utilized to develop a comprehensive understanding of the  
 290 variations in the implementation of the MPDSR policy (85). Method triangulation (89) included the use

291 semi-structured in-depth interviews and crosschecking accessible institutional records such as minutes  
292 from MPDSR review meetings, quality improvement reports, internal correspondence, DHIS2 databases  
293 and files of unprocessed/unreviewed maternal and perinatal death records. For data source triangulation,  
294 diverse categories of study participants were purposively selected and interviewed. Additionally, DW  
295 engaged in member checking after transcribing the audio-recorded interviews (79). Furthermore, AK,  
296 NW, LW reviewed and commented on case findings as they emerged (79).

297  
298 During data collection, DW maintained a database containing additional information collected from each  
299 case, including field notes manually taken during and at the end of each of interview. During data  
300 analysis, DW maintained a reflexive journal in which he noted reflections and ideas emerging from the  
301 interviews with the study participants. All these contributed to the development of the audit trail and  
302 enhanced the dependability of the study findings. Using a multiple case study design further enhanced  
303 the transferability of the study findings as the selected cases maximized diversity in the implementation of  
304 MPDSR policy which in due course may facilitate application of the study findings to other situations.  
305 Coupled with this, giving a thick description of the implementation of MPDR policy across various cases  
306 further facilitated transferability (79, 90).

307

### 308 **Results, Discussion, and Conclusions**

309 This section provides thematic analysis of the variations in the determinants of implementation of the  
310 MPDSR policy across the top and bottom performing districts included in the case study. Descriptive  
311 characteristics of the selected cases and 48 interview participants are reported elsewhere (50), as in an  
312 account of how NPT was used to explore the variations in the implementation of the MPDSR policy (49).

313

314 Six themes regarding the observed variations across cases selected from both top and bottom performing  
315 districts were identified, including: 1) perception of the implementation of the MPDSR policy, 2)  
316 leadership of the implementation process, 3) structural arrangements and coordination, 4) extent of  
317 management support and adequacy of resources, 5) variations in appraisal and reconfiguration efforts and  
318 6) variations in barriers to implementation of the policy. These themes were triangulated with responses  
319 from study participants selected from the Ministry of Health and Agencies and Professional Associations.

320

321

322

323

324 **Table 3: Summary of observed variations in the determinants of implementation across cases from the**  
 325 **different levels of care**

| Determinants of implementation         | Level of care                |                                     |                                   |                            |                                  |
|----------------------------------------|------------------------------|-------------------------------------|-----------------------------------|----------------------------|----------------------------------|
|                                        | Regional (Cases D004 & D008) | District-Public (Cases D005 & D006) | District- PNF (Cases D001 & D007) | County (Cases D002 & D003) | Sub-county (Cases D0052 & D0062) |
| <b>Sense-making Efforts</b>            |                              |                                     |                                   |                            |                                  |
| Perception                             | Mixed                        | Similar                             | Similar                           | Similar                    | Similar                          |
| Reasons                                | Mixed                        | Similar                             | Similar                           | Similar                    | Similar                          |
| Efforts                                | Mixed                        | Mixed                               | Mixed                             | Similar                    | Similar                          |
| Barriers                               | Mixed                        | Different                           | Similar                           | Different                  | Similar                          |
| <b>Relational Efforts</b>              |                              |                                     |                                   |                            |                                  |
| Leadership                             | Different                    | Similar                             | Mixed                             | Mixed                      | Similar                          |
| Organizational/structural arrangements | Mixed                        | Different                           | Mixed                             | Mixed                      | Similar                          |
| Legitimation strategies                | Different                    | Mixed                               | Mixed                             | Mixed                      | Similar                          |
| Sustainability strategies              | Different                    | Mixed                               | Mixed                             | Similar                    | Similar                          |
| Barriers                               | Mixed                        | Mixed                               | Mixed                             | Mixed                      | Different                        |
| <b>Operational Efforts</b>             |                              |                                     |                                   |                            |                                  |
| Teamwork and collaboration             | Different                    | Different                           | Mixed                             | Similar                    | Similar                          |
| External networks                      | Different                    | Different                           | Different                         | Similar                    | Similar                          |
| Management support                     | Different                    | Similar                             | Similar                           | Different                  | Similar                          |
| Adequacy of resources                  | Different                    | Similar                             | Mixed                             | Similar                    | Similar                          |
| Barriers                               | Mixed                        | Mixed                               | Different                         | Mixed                      | Different                        |
| <b>Appraisal Efforts</b>               |                              |                                     |                                   |                            |                                  |
| Usefulness of intervention             | Similar                      | Similar                             | Similar                           | Similar                    | Similar                          |
| Evaluation strategies                  | Similar                      | Mixed                               | Similar                           | Mixed                      | Similar                          |
| Effects on individuals                 | Different                    | Similar                             | Similar                           | Mixed                      | Similar                          |
| Adjustments/reconfigurations           | Different                    | Different                           | Different                         | Mixed                      | Similar                          |
| Barriers                               | Mixed                        | Mixed                               | Mixed                             | Different                  | Different                        |

326  
 327 The determinants of the implementation of the MPDR policy and reported barriers were either  
 328 different, similar, or mixed (had both similarities and differences) between the selected cases at  
 329 the various levels of care<sup>1</sup>.

330  
 331 **Theme 1. Perception of the implementation of the MPDSR policy as different or complementary**  
 332 Most participants from both top and bottom performing districts perceived the implementation of MPDSR  
 333 policy as being different from other interventions aimed at improving maternal and child health. A few  
 334 participants, mostly from cases selected from the bottom performing districts, perceived the  
 335 implementation of the policy as complementary to other such interventions. There were also participants  
 336 from cases across both categories of districts that, despite being mandated to implement the MPDSR

<sup>1</sup> Different refers to circumstances where the determinants of implementation completely varied between the cases while similar refers to instances where the determinants of implementation were observed to be similar between the cases. Mixed refers to situations where the determinants of implementation between the cases had both similarities and differences.

337 policy, did not know whether it was different from other interventions aimed at improving maternal and  
338 child health. These different understandings about policy implementation were shared by participants  
339 from the Ministry of Health as well as Agencies and Professional Associations. Participants felt the policy  
340 differed from others in its characteristics, negative outcomes and challenges encountered in its  
341 implementation process. In terms of characteristics, participants observed that compared to other  
342 interventions, the implementation of the MPDSR policy was time-bound, required more technical inputs  
343 as well as stakeholders. Additionally, unlike other interventions, MPDSR implementation was associated  
344 with negative outcomes such as the death of a mother, a baby or both. Finally, participants observed that  
345 MPDSR policy implementation encountered unique challenges such as blaming health workers, political  
346 interference, absence of a legal framework and indiscriminate access to medical records by the police,  
347 among others. These challenges are illustrated in the following quote:

348 *We are still grappling with the difficulties of implementing the MPDSR. One, because it has*  
349 *become political, it has become legal, it is stressful for the health worker because it ends in death.*  
350 *... We have interpreted it to mean that the health worker who was looking after this mother or*  
351 *this neonate has committed a crime. So that already is difficult in itself, it brings a lot of*  
352 *problems. And you can see the health workers how they perceive it already being blamed and*  
353 *therefore its implementation cannot be completely smooth. While they would have perceived it as*  
354 *a quality-of-care improvement tool which it is, the rest of the people do not regard it like so.*  
355 *There is a lot of political interference and leadership interference when a death occurs. The sad*  
356 *thing is that they interfere at the time of death not at the time of ensuring quality of care... So*  
357 *really, I must say this has been one of the hardest policies to implement. Police coming and*  
358 *accessing information which it is not supposed to take away from the health facility unless under*  
359 *very strict conditions...But when a death occurs, the health worker becomes the victim. So,*  
360 *protection, we are grappling with protecting the health worker who is working within a broader*  
361 *weak system, health system. (APA 002F)*

362 However, those who perceived MPDSR implementation as complementary to similar interventions  
363 observed that it was part of a continuum that shared similar aims, objectives, context, approaches, and  
364 strategies to improve maternal health outcomes:

365 *Maternal and perinatal death reviews is one of the few packages in the whole complex of policies*  
366 *or approaches... I may not have a very good taste of how the others have played in the whole*  
367 *pool, but they contribute to one another, they are supposed to operate in a synergistic way. So,*  
368 *MPDSR is just an approach of making sure no mother dies. (MoH R003M)*

369 The observed variations in perception of implementing the policy may further be explained by the lack of  
370 exposure to the policy among participants from cases that were meant to be implementing the policy but  
371 were not yet doing so. This lack of exposure in part was attributed to the limited ability of the Ministry of  
372 Health to distribute and disseminate the policy guidelines across the country, as noted by one study  
373 participants below:

374 *So, as we have the guidelines in place now, we have the challenge of rolling the guidelines across*  
375 *the country. We have over 120 districts and we have to institutionalize; we'll have to*  
376 *institutionalize these guidelines in all the districts. It needs a lot of capacity at least to bring on*  
377 *board the health workers, to have the committees in place, and also, we need some logistics to*  
378 *print the materials, distribute the funds to be able to effectively respond to the gaps that have*  
379 *been identified. (MoH R001M)*

380 As a result of the above differences in the perception of implementation, there were variations in the  
381 levels of implementation effort invested across cases. For example, compared to the cases that perceived  
382 the implementation of the policy as being complementary and those that were not yet implementing, the  
383 cases that perceived the implementation as being different were observed to invest more effort via  
384 leadership, building and sustaining a community of practice, operationalizing, and appraising the effects  
385 of implementing the policy as discussed further below.

## 386 **Theme 2. Leadership of the implementation of the MPDSR policy**

387 The difference in leadership efforts at the various levels of care was the second broad theme identified.  
388 For example, the leadership of the implementation efforts across all cases selected from the top  
389 performing districts were reportedly driven forward by multidisciplinary teams of frontline health workers  
390 and were supported by senior managers. Additionally, the majority of these teams reported having  
391 designated MPDSR focal persons, departmental or unit heads who ensured that the policy and related  
392 activities were implemented and that action points were followed through. On the other hand, the  
393 leadership efforts among cases selected from the bottom performing districts differed, with some  
394 reportedly driven forward by multidisciplinary teams of frontline health workers and senior managers  
395 while others were either led by only frontline health workers or were nonexistent. The observed  
396 differences in the investment of leadership efforts across all cases positively and negatively affected other  
397 efforts such as those aimed at legitimizing participation, sustainability, teamwork and collaboration,  
398 management support and allocation of resources for implementation. For example, cases with engaged  
399 and supportive leaders reported having more cohesive teams and invested more efforts in enacting  
400 feedback from the MPDSR meetings. Furthermore, those with active leaders reported encountering  
401 limited barriers to their efforts to legitimize participation of team members. As a result of these  
402 legitimation efforts, MPDSR implementation was more sustained at cases with active leadership  
403 compared to those with challenged leadership. This point was further articulated by participants from both  
404 Agencies and Professional Associations as well as Ministry of Health, as highlighted below:

405 *... Be it in terms of notification, in terms of making meetings come on, in terms of making sure*  
406 *that these meetings gradually take place, in terms of working on the recommendations, it still*  
407 *comes back to leadership. At the facility level, are the managers willing, so, are those units*  
408 *willing? Still, it comes back to us. You can invest, and train, and do what but people will not do it.*  
409 *So, it still comes back to the issues of leadership and also interest and also that passion at the*  
410 *individual and also at the facility level. (APA 003M)*

411 *You need strong leadership at the Ministry of Health headquarters who would one, ensure that*  
412 *these guidelines are universally adopted by all health institutions, private not-for-profit, private*  
413 *health facilities, public facilities, all central institutions, all local governments. So, you need*  
414 *strong leadership there which encourages that. Then at the level of facility, they need to develop*  
415 *champions, that means you identify people, so it's not people just being recommended and say*  
416 *now we have an audit committee or review committee, you need to identify leaders who emerge,*  
417 *who are passionate to become champions and like to see this move forward.... (APA 005M)*

### 418 **Theme 3. Structural arrangements and coordination of MPDSR policy implementation efforts**

419 Our third theme pertains to the difference in structural arrangements and coordination of implementation  
420 efforts as a source of variation in implementation. Most of our cases reported having structures such as  
421 MPDSR Committees and District Health Teams (DHTs) that supported coordination and implementation.  
422 However, the duration of their existence, composition, functionality, availability, and level of support  
423 received from implementing partners, Ministry of Health and the community/local leaders greatly  
424 accounted for the differences in how these structures affected the coordination and implementation  
425 efforts. For example, while most of the cases from top performing districts reported having  
426 multidisciplinary and relatively functional MPDSR Committees and DHTs that were also supported by  
427 implementing partners, the composition, functionality, and support for these structures among cases from  
428 the bottom performing districts varied. While at some cases, the MPDSR Committees and DHTs had  
429 recently been established (D006), elsewhere they were reportedly not functioning adequately, lacked  
430 internal cohesion and teamwork (D004, D003) or were nonexistent (D0062). Compared to cases from the  
431 top performing districts, all structures across bottom performing district cases were not supported by  
432 implementing partners. In addition, due to the staffing challenges reported among these cases, the  
433 composition of the MPDSR committees did not follow MPDSR guidelines. Who was engaged also  
434 varied: the private-not-for profit case selected from the rural setting reportedly engaged stakeholders  
435 including the district health team, community leaders and politicians in its MPDSR Committee  
436 coordination and implementation efforts, but the case from the urban setting relied more on the health  
437 facility frontline health workers, senior managers, and hospital administration team. Indeed, participants  
438 from Agencies and Professional Associations and MoH further illuminated the importance of structural  
439 arrangements and coordination efforts on implementation success. For example, despite acknowledging  
440 the extensive support (technical, financial, and material) that agencies and professional associations  
441 extended towards the coordination and implementation of the policy, the diverse number of implementing  
442 partners, their interests and priorities were reported to hinder the ability of the MoH to coordinate and  
443 equitably distribute them across the country.

444 A representative of one of the Agencies highlights the role of implementing partners at the national,  
445 district and health facility levels:

446 *So, we strengthen the government both at national and facility [level] but also districts to make*  
447 *sure that MPDSR is up and running. At national level we support coordination by Ministry of*  
448 *Health, there is a National MPDSR Committee to make sure it functions well, to compile, collect*  
449 *and analyze MPDSR data at national level which is an aggregate of information which comes*  
450 *from the districts. Then we also support the country or Ministry of Health to make sure that*  
451 *MPDSR committees at district but also facility, are in place.... (APA 003M)*

452 However, coordinating these partners and ensuring equitable resource distribution across the entire health  
453 system were also observed as key challenges:

454 *...Then, because the players are so many, the coordination becomes a challenge for all of them to*  
455 *be brought on the same table to discuss the same subject at the national level but also at the*  
456 *district level, even at the health facility level because you may find that these different partners*  
457 *who are supporting particular intervention sometimes each of them brings in special needs*  
458 *because they want to capture different types of data. Although government definitely is very*  
459 *positive on this to say we have a national guidance on the kind of data, basic data we want to*  
460 *pick for our health information management system, first fulfill this and then the health worker*  
461 *can do other things. (APA 002F)*

462 *No, we've been implementing but piecemeal. Different implementing partners and even the*  
463 *government have been implementing without a coordinated and harmonized approach but now*  
464 *with the guidelines we find it has been followed up because it centered on the establishment of a*  
465 *maternal [and] perinatal deaths surveillance committee at the facility and at district level such*  
466 *that we could be able to coordinate the notification and reviews. We could also mobilize*  
467 *resources in a coordinated manner, we could bring on board all the different stakeholders that is*  
468 *the policy makers, the implementers, and any other stakeholders in the community. (MoH*  
469 *R001M)*

470 Additionally, the generally inadequate resources from the Government of Uganda for the health sector  
471 generally and MPDSR implementation specifically were also reported to subject the MoH to  
472 donor/development partner dependency (conditional funding), subsequently affecting structural  
473 arrangements and implementation coordination efforts:

474 *Ideally government is supposed to determine but partners will come with multisectoral funding*  
475 *and the problem of multisectoral funding, while they bring money, they try to use the principle of*  
476 *"he who pays the piper", at some point, for me I have funds and I want my funds to be put in the*  
477 *same place. So, while its multi-partner funding, they will ask government to identify where they*  
478 *need to put the money. So, government will have to develop an index, given their strategic*  
479 *objectives of interest. So, you might find still that while most of the projects are packaged in such*  
480 *a way that the funder wants to implement a package in the same place, the different sectors will*  
481 *not have a big opportunity to determine as sectors where they want this funding to go, ...That*  
482 *limits on how implementation is actually done and distribution of the services.... (MoH R003M)*

483 And as further noted, this leads to vertical programming, duplication of administrative processes and  
484 interventions covering certain communities but not the entire health system.

485 *... While partners have been supporting all these processes, we have had them confined*  
486 *themselves to certain communities of their interest...like marginalized communities and war-torn*



487 *zones, humanitarian communities, and this limits the implementation of the whole set of*  
488 *interventions in the whole country. So, you might find some part of the country has a dose of*  
489 *intervention well-articulated and well implemented but the other parts of the country where the*  
490 *problem could be, is not because they use more of an index decision.... (MoH R003M)*

491

492 **Theme 4. Extent of management support and adequacy of resources to implement the MPDSR**  
493 **policy.**

494 Related to the above, our fourth theme describes how the differences in management support and  
495 adequacy of resources may explain the differences in implementation. Whereas cases from the top  
496 performing districts (except D0052) reported having supportive and engaged management that enabled  
497 policy operationalization, the extent of management support among cases from the bottom performing  
498 districts varied. For example, while participants from case D006 reported having supportive and engaged  
499 management, those from D003 were divided about the extent of management support. Among the most  
500 frequently reported parameters for gauging management support were active participation of managers in  
501 the maternal and perinatal death reviews, enacting feedback, and recommendations, demanding  
502 accountability, creating an enabling environment and resource allocation:

503 *Management support, of course now they have regular meetings, and they are able to address*  
504 *anything. In fact, weekly meetings. Two, they make sure that the ambulance and the driver is*  
505 *facilitated every day. They give supper to the driver, and they give some allowance to the driver*  
506 *for every day he sleeps around and then fuel is always there. And there is a hospital ambulance*  
507 *line which is now known to the community and all health centers have it such that in case they*  
508 *call it, this person should be able to respond. If this person is not able to respond they call one of*  
509 *the administrator's line because there are some people who know the administrators. There are*  
510 *times when the ED drives the ambulance if the driver is stuck somewhere, the ED goes there to*  
511 *pick the patient. Therefore, I think the management is somehow committed to seeing work done.*  
512 *(D001 R002M)*

513 However, despite acknowledging management support, the majority of the participants across cases were  
514 divided about the adequacy of resources to operationalize the policy. For example, whereas participants  
515 from one of the private-not-for profit cases (D007) observed that implementation does not require many  
516 resources and therefore had adequate resources, their counterparts from the rural case (D001) were  
517 divided about the same issue. While some said the resources were adequate others noted that the  
518 resources were inadequate. A similar trend was observed among cases selected from the public sector  
519 from both top and bottom performing districts. The contrast between these cases and observations about  
520 adequacy of resources even among participants from the MoH, Agencies and Professional Associations  
521 warrant further exploration of what resources are required to implement the MPDSR policy and at what  
522 levels. As local site respondents from an urban (D007) and rural (D001) site noted:

523 *For the audits, our audits are relatively cheap, the space is readily available, and we do not have*  
524 *to rent the space. Two, the meetings are early in the morning, so you do not need to provide break*  
525 *or lunch. So, there is no extra snack required and the meeting venue is relatively small, so you*  
526 *don't need a public address [system]. Then the documentation is manual, so you don't need a lot*  
527 *of computers. You may need like once in a while a projector and a laptop to screen if it's like a*  
528 *CME or something. That is all that would go into, like something you would really need but it's*  
529 *under the department, to make sure every department has a computer and an LCD projector. So,*  
530 *in terms of really whether we need a lot of resources to conduct an audit, no we don't. (D007*  
531 *R001M)*

532 *If I am to talk about neonatal, we are lacking a lot of resources because there is a NICU, we are*  
533 *supposed to have equipment, so we find out that we are lacking equipment ... We find out like*  
534 *neonates are supposed to be fed by syringe drivers, we don't have. When we receive prematures*  
535 *we get stuck where to put them, incubators, only two warmers, only two. So, if they are more than*  
536 *four, we just improvise, and fix and yet cross infection comes in. So, when it comes to feeding*  
537 *materials, like now we are improvising, they are trying to buy raw plates and improvise.... So that*  
538 *is also a challenge. When it comes to bed codes, we are still lacking because we can*  
539 *accommodate 15-20 but when we get more than twenty, it becomes a problem. And that child*  
540 *labor [ward] in a month, we can admit about 70 to 100. (D001 R004M)*

541

## 542 **Theme 5. Variations in appraisal and reconfiguration of the MPDSR policy implementation efforts**

543 The fifth potential explanation for the observed variations in the determinants of implementation was in  
544 regard to the level of efforts invested by sites in assessing and understanding the ways in which the  
545 implementation affects them and others around them. Regardless of whether they belonged to the top or  
546 bottom performing districts, all sites that were implementing the policy acknowledged the usefulness of  
547 its implementation and cited examples of this. Among these were reduced maternal and perinatal deaths,  
548 improved service delivery, enhanced vigilance, improved staff performance, reflexive learning, and  
549 enhanced teamwork. To evaluate the worth/usefulness of implementing the MPDSR policy, participants  
550 reported using various approaches and strategies. These included continuing medical education sessions  
551 (CMEs), conducting maternal and perinatal death reviews/audits, meetings, implementing quality  
552 improvement projects, documentation and reporting as well as stakeholder engagement activities such as  
553 radio talk shows and community outreach. Additionally, Agencies, Professional Associations and MoH  
554 noted performance ranking, conducting pilots and trainings, annual joint reviews, piloting an event  
555 tracker, establishing a call center as well as compiling an annual MPDSR report as implementation  
556 appraisal mechanisms. At the individual level, participants from across the cases reported that the  
557 implementation had both positive and negative effects although others observed that it no longer affected  
558 them since it had been routinized in their settings. Among the positive individual effects were enhanced  
559 vigilance and confidence, reflexive learning, commitment, motivation, mentorship, and quality  
560 improvement. Negatively, participants observed that the implementation increased their workload, led to

561 exhaustion and delays in attending to patients. Some noted that implementation led to constrained  
562 interpersonal relationships where giving challenging feedback was misconstrued as blaming.

563 Across both categories of cases, participants reported undertaking infrastructural developments and  
564 readjustments as a result of implementing the MPDSR policy. However, with the exception of a nursery  
565 that was established at one of the sites from the bottom performing districts and the neonatal intensive  
566 care units (NICUs) that were established across both categories of cases, the majority of infrastructure  
567 changes were reported among cases selected from top performing districts. These included establishment  
568 of a maternity theater, high dependency unit (HDU), oxygen plant, a blood bank as well as a private wing  
569 at one of the cases. Whereas cases from the top performing districts cited more examples of service  
570 delivery related adjustments, the majority of the cases from the bottom performing districts were  
571 optimistic that the implementation of the policy would lead to more adjustments in the future. For  
572 example, while cases from the top performing districts reported hiring more staff, appointing focal  
573 persons, re-allocating staff, engaging volunteer nurses, adjusting MPDR forms, changing meeting times,  
574 providing accommodation to staff, acquiring equipment, and strengthening ambulatory services, only one  
575 case from among the bottom performing districts reported that policy implementation had resulted in the  
576 establishment of an MPDR committee and designing admission forms to capture vital observations.

577 Although at the health facility level participants were able to appraise and articulate the contribution of  
578 implementing the MPDSR policy as described above, most MoH, Agency and Professional Association  
579 participants noted that assessing its contribution on health outcomes such as mortality reduction was  
580 complex. They noted that the system-wide nature of the policy exposes it to several confounding factors  
581 which in due course limit attribution of outcomes to the policy itself. Despite the observed attribution  
582 challenges, participants noted that if well-implemented and institutionalized, benefits a could be measured  
583 and teased out:

584 *But overall, when it becomes part and parcel of a routine quality improvement, the facility will*  
585 *when you go to it, you'll find that there are many other good practices they have adapted. The*  
586 *health workers for example will develop performance plans as individuals, as part of good human*  
587 *resource management practices. You will find that they bond more as a team... You can't have the*  
588 *maternity side alone improving, the obstetric side alone improving, it's impossible, you cannot*  
589 *sustain it. So, that is why it's got to be the health systems improvement in general. (APA005M)*

590

## 591 **Theme 6. Variations in the barriers to the implementation of the MPDSR policy**

592 Overall, the existence of various barriers – the last theme - across different levels of care was an  
593 important driver of the differences in the implementation of the MPDSR policy. Although these barriers  
594 differed across cases, levels of care, and categories of study participants, there were some common ones  
595 worth noting. For example, across cases from the top and bottom performing districts, the most common

596 reported barrier was limited or no feedback from the MoH regarding implementation of the maternal and  
597 perinatal death reviews. This was followed by inadequate knowledge and skills of the MPDSR processes,  
598 specifically the classification and reporting of deaths. The lack of systematic documentation approaches  
599 and inadequate materials were reported across cases although mostly among those from top performing  
600 districts. Additionally, inadequate staffing, funding, and supplies including blood shortages and drug  
601 stockouts, late referrals plus busy schedules or competing priorities were highlighted across both  
602 categories of cases. The structural set up of the health facilities was in some cases (from both categories)  
603 reported to constrain interdepartmental linkages and teamwork, along with a lack of a culture of data  
604 utilization, accommodation for frontline health workers, and inadequate equipment and ambulatory  
605 services. Although participants from top district cases highlighted inadequate performance incentives and  
606 the negative effects of the punitive approach that was adopted at the onset of implementing the policy as  
607 their unique barriers, participants from cases among the bottom performing districts cited several others.  
608 These included limited management support, negative staff attitudes, lack of teamwork, backlogs of  
609 unaudited maternal and perinatal deaths, infrastructural barriers such as inadequate space, lack of  
610 accessibility to and by some hard-to-reach communities, absence and or exit of implementing partners as  
611 well as poor information communication and technology infrastructure.

612 The existence and effects of these barriers on the implementation of the MPDSR policy was validated by  
613 accounts of participants from MoH, Agencies and Professional Associations, who also made  
614 recommendations on how to address them. For example, the limited or lack of feedback from the MoH as  
615 a common barrier affecting implementation of the MPDSR policy across cases was in part attributed to  
616 absence of a strong feedback and response mechanism to trigger immediate action at the national level:

617 *We don't have a mechanism for such a kind that tracks actions, ... that responds adequately,*  
618 *maybe it's limited due to the inadequate resources that we have, that we may not have enough*  
619 *capacity to respond the issues as they come by. But if I am evaluating the system, that part is still*  
620 *missing. While they have tried to report and review, they may not have done the complete total*  
621 *reporting of all the deaths, but the numbers of maternal deaths that are reported are really*  
622 *scaring enough for us to have done something. I know it is because of limited resources because*  
623 *some work is being done definitely, there is a lot of work being done to respond to some of those*  
624 *issues, a lot of trainings have gone on to respond to the issues, but we do not have such a kind of*  
625 *impulsive or system to trigger an immediate response, the immediate response is still missing.*  
626 *The response might come but it might come later. (MoH R003M)*

627 Additionally, the inadequate knowledge and skills of the MPDSR processes such as classifying and  
628 reporting maternal and perinatal deaths were also reported to hinder implementation across cases from all  
629 districts. As site-level providers reported:

630 *Now it happens that of course sometimes it becomes very tricky, where a mother comes in. This*  
631 *mother maybe has been mismanaged in a health center, if I can use that word, or maybe it is the*  
632 *patient or the attendant. There, the delays are not with us, then a mother comes in and within a*

633 *short period of like maybe for you, you have managed for one hour and the mother dies. Now they*  
634 *count that maternal death that D005 has lost mother and the mother has to be counted on D005.*  
635 *That thing is still a challenge I must say, a very big challenge to us and of course you can't run*  
636 *away from it. (D005 R004F)*

637 *But for the babies it is a bit tricky. So, for the perinatal [death], it is hard to know, I cannot judge*  
638 *but previously you would not even see them reporting. Like they have actually had either fresh*  
639 *still birth or a death before like between 28 to term, like still birth like they could not indicate*  
640 *more so the neonatal deaths, that death between 1 day to 7 days and that death that maybe the*  
641 *baby died in utero but in what, in that period of delivery. So, you would only get reports of*  
642 *macerated stillbirths, these deaths that happen sometime prior to what, to delivery. So, it is still a*  
643 *question, you would wonder actually why they were not getting it. But now they are a bit positive,*  
644 *when they have lost a baby, you would get a report. (D006 R001F)*

645

646 Although the inadequacy of systematic documentation approaches, tools and materials was reportedly  
647 being addressed by implementing partners, participants also observed that it was affecting the quality of  
648 data as well as dissemination of success stories:

649 *But like we have discussed earlier, most of us in the hospital are in clinical service and you know*  
650 *we need to have someone step out of clinical service, and look and say, what are you guys doing?*  
651 *Are you doing it right? Are you doing it at the right time? Are you doing it the right way? And*  
652 *keep it up, you understand? We keep doing things and unfortunately, we lack that part in our*  
653 *[system]... so apart from a couple of people who come up with a publication and the like, but*  
654 *management is also tired of that. So, we are in a way trying to support getting someone to take a*  
655 *bird's eye view of the activities in the hospital. .... But I haven't seen a publication come out with*  
656 *how many positive pap smears have we seen? How many abnormal paps have we treated? When*  
657 *we treat these paps in D007, how many come back with after 5 years positive lesions? ... So that*  
658 *is one of the challenges we have, that there is no one to take that look for us. (D007 R002M)*

659 Furthermore, the negative staff attitudes reported mostly by participants from cases selected among the  
660 bottom performing districts were attributed to the negative experiences they had encountered while  
661 implementing the policy including experiencing blame for deaths, interrogation by police and at times  
662 interdictions from work:

663 *The attitude of health workers, implementing MPDSR is a big issue. It's not all health workers*  
664 *that have an attitude, but some health workers might have an attitude on MPDSR because of the*  
665 *previous experiences and maybe what they have seen others have gone through. For me that has*  
666 *really impacted so much on how people are doing MPDSR. (MoH R003M)*

667 Beyond the common barriers that focused on health facilities, participants also highlighted limited access  
668 and utilization of the facilities as major barriers affecting MPDSR implementation. The inability of  
669 mothers to access health facilities due to distance, high poverty levels coupled with inequitable  
670 distribution of facilities was reported to hinder effective policy implementation to prevent deaths of

671 mothers and babies from previously identified causes. However, as observed below, mothers and babies  
672 continue to die from avoidable causes, casting doubt on the usefulness of the MPDSR policy:

673 *The other challenge has been our communities being very rural and poor- poverty remains a very*  
674 *big issue. We have a limited number of facilities that can provide both health and other social*  
675 *services, especially in geographical coverage. You might find that a number of facilities could be*  
676 *there but most of them are confined in particular groups of density in terms of geographical*  
677 *distribution, they are more dense in some places and other places are not covered. That causes a*  
678 *bit of a challenge in having interventions distributed evenly in the country and covering the wider*  
679 *community of people who would benefit from them. (MoH R003M)*

## 680 **Discussion**

681 This study identified six themes that explain the observed variations in the determinants of  
682 implementation of the MPDSR policy across selected health facilities in Uganda: 1) perception of the  
683 implementation of the MPDSR policy, 2) leadership of the implementation process, 3) structural  
684 arrangements and coordination, 4) extent of management support and adequacy of resources, 5) variations  
685 in appraisal and reconfiguration efforts and 6) variations in barriers to implementation of the policy.

686 Considering that the variations in perception of the implementation of the policy affected the levels of  
687 relational, operational and appraisal efforts invested by the policy implementers across high and low  
688 performing health facilities, there is need to invest more sense making efforts especially differentiating  
689 how the implementation of the policy differs and or complements other interventions aimed at reducing  
690 maternal and perinatal mortality. Investing in sense making efforts and creating more awareness about the  
691 characteristics that distinguish the MPDSR policy from other interventions, its benefits, aims and  
692 objectives, processes involved, activities, inputs and outputs, as well as implementation barriers and  
693 facilitators, may contribute to success. While previous efforts have been geared towards understanding  
694 the barriers and facilitators to implementations (50, 75-78) further studies aimed at differentiating  
695 implementation of the MPDSR policy from other interventions could enable implementers to devise  
696 context-appropriate mechanisms and strategies to enhance integration and embedding within specific  
697 contexts (e.g., district vs. health facility).

698 Similarly, relational efforts, especially leadership, had ripple effects on other determinants of  
699 implementation. For example, it was observed that facilities that invested adequate leadership efforts  
700 including establishing multidisciplinary teams, legitimizing participation of other members, designating  
701 MPDSR focal persons and ensuring accountability, performed better at implementation of the policy than  
702 those who did not. The absence of engaged leadership did not only negatively impact relational but also  
703 operational efforts including collaboration among team members, division of labour, allocation of  
704 resources as well as the extent of management support. Previous studies have highlighted leadership as a  
705 key facilitator of MPDSR policy implementation (10, 14, 17-19, 37, 61, 64, 78, 91). Therefore, making

706 sufficient investments in developing leadership capacity for MPDSR policy implementation may help to  
707 address several identified barriers including those relating to the structural arrangements and coordination  
708 of implementation efforts.

709 While developing leadership capacity for MPDSR policy implementation may be critical to addressing  
710 the reported structural arrangement and coordination barriers, tasking the leadership with the  
711 responsibility to institutionalize regular appraisal (reflexive monitoring) of the policy implementation  
712 efforts across all health facilities could constitute a key priority. It could for example enable the  
713 leadership to review the composition, functionality and support required by district and health facility  
714 level MPDSR Committees. At the national level, engaging in regular reflexive monitoring efforts may  
715 facilitate adoption of strategies to reconfigure the approaches used to activate implementation of the  
716 policy across different levels of care. This would help address some of the observed discrepancies in the  
717 policy documents which reported that the Ministry of Health mandated various levels of care to  
718 implement the policy (74), yet there were facilities that were yet to even learn about the policy. As such,  
719 findings from this study highlight the need to engage in reflexive monitoring efforts including  
720 undertaking a national assessment of all implementation efforts. However, undertaking such an  
721 assessment requires leadership and management support starting at the health facility level through to the  
722 Ministry of Health.

723 Relatedly, the reported absence of implementing partners across some of the facilities mandated to  
724 implement the policy further points to the need for leadership to champion integration of equity  
725 considerations in the implementation of the policy (92). Embedding equity considerations in the  
726 implementation of the MPDSR policy would ensure prioritizing equitable allocation of implementing  
727 partners, resources and supports across all health facilities mandated to implement the policy. It would  
728 also ensure paying attention to the observed contextual variations and associated negative consequences.  
729 For example, integrating equity considerations would help ensure that the plight of health facilities  
730 located in hard to reach parts of the country and their unique barriers that contribute to high maternal and  
731 perinatal mortalities in such contexts are considered and prioritized when allocating resources and  
732 support. It could also help to facilitate the engagement of the intended policy beneficiaries to contribute  
733 towards generating contextually appropriate strategies to reduce maternal and perinatal mortalities. Most  
734 importantly, embedding equity considerations could provide platforms for meaningful and equitable  
735 partnerships between the Ministry of Health and the implementing partners. Collectively, these actions  
736 could greatly contribute to enhancing the sustainability of the policy implementation efforts (93-95).

737 Whereas the challenge of inadequate resources remains endemic across most LMIC contexts and  
738 subsequently affects the capacity of health systems to engage implementing partners and strategically  
739 influence the agenda-setting processes (32, 33, 62, 63, 96, 97), there is need to explore the question of  
740 what resources are required to successfully implement the MPDSR policy across LMIC contexts, Uganda

741 inclusive. This stems from the observed variations regarding the adequacy of resources between and  
742 among participants from both top and bottom performing categories. An enhanced understanding of the  
743 resources required to implement the MPDSR policy could help improve the capacity of national  
744 governments and institutions such as ministries of health and health facilities to plan and adequately  
745 manage the scarce resources. Additionally, it could influence adoption of strategies to sustain initiatives  
746 implemented courtesy of the support from implementing partners. Current evidence indicates limited  
747 continuity and sustainability of initiatives implemented courtesy of donor/implementing partner funding  
748 immediately after the initial funding runs out (93-95, 98).

749 Despite the reported ability to appraise the usefulness and benefits of its implementation, several  
750 challenges including absence of systematic approaches to measure and attribute the observed reductions  
751 in maternal and perinatal mortality to the implementation of the MPDSR policy still abide (10, 61).  
752 Coupled with this is the limited use of theories, models and frameworks as well methodologies to  
753 generate both empirical qualitative and quantitative data on the impact of MPDSR policy implementation  
754 on the reduction of maternal and perinatal mortalities (10, 49, 50)]. Additionally, the inadequate  
755 systematic documentation approaches as well as the reported absence of a culture of data utilization  
756 hinder the appreciation of the intervention among key decision makers and the subsequent prioritization  
757 of decisions regarding resource allocation, staffing, accommodation for health workers as well as stocking  
758 supplies and consumables among other noted challenges (10, 61). While the impacts of implementation  
759 can be tracked at health facility level, there is need to devise, and integrate standardized documentation  
760 approaches to systematically document and assess the usefulness and benefits of implementing the policy  
761 across the entire health system (10, 36, 37, 56, 57, 62-65, 67, 68). Integrating theories, models and  
762 frameworks in the design, implementation and evaluation of MPDSR may as well enhance replication of  
763 efforts across similar settings and generalizability of findings (50, 61)

#### 764 **Limitations**

765 The lack of access to documented evidence to support claims by study participants who might have had  
766 an overrated perception of their implementation efforts could have constituted a limitation for the study.  
767 However, our qualitative data provide detailed descriptions of implementation processes beyond official  
768 documentation, with consistency in findings across the high and low performing districts. While the use  
769 of a theoretical approach helped to enhance the credibility and authenticity of the study findings, adjusting  
770 and customizing the language used to describe NPT constructs to effectively explore the study objectives  
771 was somewhat challenging. It resulted in several overlaps between participants' responses across various  
772 constructs and subconstructs complicating data coding and analysis. Nonetheless, an audit trail (99) of the  
773 study procedures followed from the stages of conceptualization, analysis to reporting is available (50).  
774 Our data source triangulation (89), including field notes and member checks (79) further enhanced the  
775 credibility of the study findings.



776 Although private health providers were not covered in this study, findings from this study offer a more  
777 representative picture regarding the ongoing MPDSR implementation efforts and may inform larger  
778 scale/national assessments. The use of a multiple case study design further enhanced the transferability of  
779 the study findings as the selected cases maximized diversity in the implementation of MPDSR policy  
780 which may facilitate application of the study findings to other situations.

## 781 **Implications**

782 First, this study contributes to substantive knowledge by providing much-needed evidence on what sense-  
783 making, relational, operational and appraisal efforts actors are currently investing in, and how these are  
784 affecting the implementation of the MPDSR policy across various settings. As noted by Kinney et al.,  
785 although actors' subjective experiences, relationships, motivations, implementation climate and their  
786 ability to communicate greatly influence implementation processes, these have received little empirical  
787 attention (10). As such, this study contributes contextually-relevant knowledge that may enhance  
788 understanding of the efforts invested by actors and subsequently help improve practice across the  
789 different levels of care. Additionally, uptake and utilization of these study findings by policy makers may  
790 enhance the capacity of the health system to address the high burden of maternal and perinatal mortality  
791 and contribute to strategies such as ending preventable maternal mortality to achieve sustainable  
792 development goals.

793 Second, findings from this study contribute to policy evaluation and organizational practice by providing  
794 a preliminary assessment of the implementation of the policy across various levels of care. Since the  
795 inception of the MPDSR policy in Uganda, there have not been empirical studies conducted across the  
796 health system to assess its implementation. Previous efforts have explored implementation of the policy in  
797 one facility or across facilities funded by a particular implementing partner (75-78). However, the design  
798 of this study has helped generate findings across various levels of care without being limited to a  
799 particular funding agency or implementing partner. Policy makers may thus utilize findings from this  
800 study to make evidence-informed decisions regarding current and future implementation efforts.

801 Third, findings from this study advance understanding of the utility of NPT in exploring implementation  
802 of health policy interventions. To the best of our knowledge, this is the first study to use an  
803 implementation science theoretical approach to explore implementation of the MPDSR policy across  
804 different levels of care of a health system. Previous studies have observed that the limited use of such  
805 approaches especially among LMICs may account for the limited understanding of the variations in the  
806 implementation of interventions including the MPDSR policy as well as their reported minimal impact in  
807 reducing maternal and perinatal mortality and morbidity (10, 38-42). Furthermore, the use of NPT to  
808 study the implementation of the MPDSR policy may offer an explicit and generalizable framework for

809 analysis of other implementation efforts across differing settings and individuals thereby enhancing  
810 applicability and utility of these study findings (42, 45-48).

## 811 **Conclusion**

812 Across the top and bottom performing districts, the variations in MPDSR policy implementation were  
813 explained by differences in understanding of the implementation process, influence of cognitive  
814 participation efforts, the resource allocation and appraisal work around implementation of the policy as  
815 well as the differences in the barriers encountered in implementing the policy in different contexts.  
816 Broadly, findings from this study demonstrate that understanding implementation of complex policy  
817 interventions such as the MPDSR requires going beyond identifying the barriers and facilitators to  
818 exploring what the actors involved in the implementation processes actually do and how it affects  
819 implementation of the intervention. This can be accomplished through applying and utilizing theoretical  
820 approaches such as NPT. Exploring the sense-making, relational, operational and appraisal efforts that  
821 actors invest in implementation of complex interventions is critical to understanding why and how such  
822 interventions become embedded and sustained in some settings, yet struggle or completely fail in others.  
823 Insights generated from this study can be used to inform efforts to develop, design, modify and or scale  
824 up implementation of the MPDSR policy across the Ugandan health system as well as similar contexts.  
825

826 **Acknowledgements**

827 The authors wish to thank the individuals who participated in the interviews and offered  
828 invaluable insights that facilitated making sense of the variations in the determinants of  
829 implementation of the MPDSR policy in Uganda.

830

## 831 References

- 832
- 833 1. World Health Organization. Maternal mortality: The urgency of a systemic and  
834 multisectoral approach in mitigating maternal deaths in Africa. 2023.
- 835 2. Callister LC, Edwards JE. Sustainable development goals and the ongoing process of  
836 reducing maternal mortality. *Journal of Obstetric, Gynecologic & Neonatal Nursing*.  
837 2017;46(3):e56-e64.
- 838 3. Child EWE. The global strategy for women's, children's and adolescents health. New  
839 York, NY: Every Woman Every Child. 2015.
- 840 4. Benson J, Andersen K, Samandari G. Reductions in abortion-related mortality following  
841 policy reform: evidence from Romania, South Africa and Bangladesh. *Reproductive*  
842 *health*. 2011;8(1):39.
- 843 5. Blaauw D, Erasmus E, Pagaiya N, Tangcharoensathien V, Mullei K, Mudhune S, et al.  
844 Policy interventions that attract nurses to rural areas: a multicountry discrete choice  
845 experiment. *Bulletin of the World Health Organization*. 2010;88:350-6.
- 846 6. Colaci D, Chaudhri S, Vasan A. mHealth interventions in low-income countries to  
847 address maternal health: a systematic review. *Annals of global health*. 2016;82(5):922-  
848 35.
- 849 7. Eamer GG, Randall GE. Barriers to implementing WHO's exclusive breastfeeding policy  
850 for women living with HIV in sub-Saharan Africa: an exploration of ideas, interests and  
851 institutions. *The International journal of health planning and management*.  
852 2013;28(3):257-68.
- 853 8. Ganaba R, Ilboudo PG, Cresswell JA, Yaogo M, Diallo CO, Richard F, et al. The  
854 obstetric care subsidy policy in Burkina Faso: what are the effects after five years of  
855 implementation? Findings of a complex evaluation. *BMC pregnancy and childbirth*.  
856 2016;16(1):84.
- 857 9. Gilson L, Raphaely N. The terrain of health policy analysis in low and middle income  
858 countries: a review of published literature 1994–2007. *Health policy and planning*.  
859 2008;23(5):294-307.
- 860 10. Kinney MV, Walugembe DR, Wanduru P, Waiswa P, George A. Maternal and perinatal  
861 death surveillance and response in low- and middle-income countries: a scoping review  
862 of implementation factors. *Health policy and planning*. 2021;36(6):955-73.
- 863 11. Koduah A, van Dijk H, Agyepong IA. Technical analysis, contestation and politics in  
864 policy agenda setting and implementation: the rise and fall of primary care maternal  
865 services from Ghana's capitation policy. *BMC health services research*. 2016;16(1):323.
- 866 12. Panisset U, Koehlmoos TP, Alkhatib AH, Pantoja T, Singh P, Kengey-Kayondo J, et al.  
867 Implementation research evidence uptake and use for policy-making. *Health Res Policy*  
868 *Syst*. 2012;10(20):4505-10.
- 869 13. Pena-Rosas JP, De-Regil LM, Rogers LM, Bopardikar A, Panisset U. Translating  
870 research into action: WHO evidence-informed guidelines for safe and effective  
871 micronutrient interventions. *The Journal of nutrition*. 2012;142(1):197S-204S.
- 872 14. Perry W, Nejad SB, Tuomisto K, Kara N, Roos N, Dilip T, et al. Implementing the WHO  
873 Safe Childbirth Checklist: lessons from a global collaboration. *BMJ global health*.  
874 2017;2(3):e000241.
- 875 15. Pyone T, Smith H, van den Broek N. Implementation of the free maternity services  
876 policy and its implications for health system governance in Kenya. *BMJ global health*.  
877 2017;2(4):e000249.

- 878 16. Ramanathan S, Allison K, Faulkner G, Dwyer JJ. Challenges in assessing the  
879 implementation and effectiveness of physical activity and nutrition policy interventions  
880 as natural experiments. *Health Promotion International*. 2008;23(3):290-7.
- 881 17. Ritchie LMP, Khan S, Moore JE, Timmings C, van Lettow M, Vogel JP, et al. Low-and  
882 middle-income countries face many common barriers to implementation of maternal  
883 health evidence products. *Journal of clinical epidemiology*. 2016.
- 884 18. Stokes T, Shaw EJ, Camosso-Stefinovic J, Imamura M, Kanguru L, Hussein J. Barriers  
885 and enablers to guideline implementation strategies to improve obstetric care practice in  
886 low-and middle-income countries: a systematic review of qualitative evidence.  
887 *Implementation Science*. 2016;11(1):144.
- 888 19. Vogel JP, Moore JE, Timmings C, Khan S, Khan DN, Defar A, et al. Barriers, facilitators  
889 and priorities for implementation of WHO maternal and perinatal health guidelines in  
890 four lower-income countries: a GREAT network research activity. *PLoS One*.  
891 2016;11(11).
- 892 20. Agyepong IA, Kwamie A, Frimpong E, Defor S, Ibrahim A, Aryeetey GC, et al.  
893 Spanning maternal, newborn and child health (MNCH) and health systems research  
894 boundaries: conducive and limiting health systems factors to improving MNCH outcomes  
895 in West Africa. *Health research policy and systems*. 2017;15(1):54.
- 896 21. Althabe F, Bergel E, Cafferata ML, Gibbons L, Ciapponi A, Alemán A, et al. Strategies  
897 for improving the quality of health care in maternal and child health in low and  
898 middle income countries: an overview of systematic reviews. *Paediatric and perinatal  
899 epidemiology*. 2008;22:42-60.
- 900 22. Bhutta ZA, Ali S, Cousens S, Ali TM, Haider BA, Rizvi A, et al. Alma-Ata: Rebirth and  
901 Revision 6 Interventions to address maternal, newborn, and child survival: what  
902 difference can integrated primary health care strategies make? *Lancet (London, England)*.  
903 2008;372(9642):972-89.
- 904 23. Bright T, Felix L, Kuper H, Polack S. A systematic review of strategies to increase access  
905 to health services among children in low and middle income countries. *BMC health  
906 services research*. 2017;17(1):252.
- 907 24. Dettrick Z, Firth S, Soto EJ. Do strategies to improve quality of maternal and child health  
908 care in lower and middle income countries lead to improved outcomes? A review of the  
909 evidence. *PLoS One*. 2013;8(12).
- 910 25. Ekman B, Pathmanathan I, Liljestrand J. Integrating health interventions for women,  
911 newborn babies, and children: a framework for action. *The lancet*. 2008;372(9642):990-  
912 1000.
- 913 26. Kana MA, Doctor HV, Peleteiro B, Lunet N, Barros H. Maternal and child health  
914 interventions in Nigeria: a systematic review of published studies from 1990 to 2014.  
915 *BMC public health*. 2015;15(1):334.
- 916 27. Lassi ZS, Middleton PF, Bhutta ZA, Crowther C. Strategies for improving health care  
917 seeking for maternal and newborn illnesses in low-and middle-income countries: a  
918 systematic review and meta-analysis. *Global health action*. 2016;9(1):31408.
- 919 28. McCoy D, Storeng K, Filippi V, Ronsmans C, Osrin D, Borchert M, et al. Erratum to  
920 “Maternal, neonatal and child health interventions and services: moving from knowledge  
921 of what works to systems that deliver” [*International Health* 2 (2010) 87–98].  
922 *International Health*. 2010;2(3):228-.
- 923 29. Wekesah FM, Mbada CE, Muula AS, Kabiru CW, Muthuri SK, Izugbara CO. Effective  
924 non-drug interventions for improving outcomes and quality of maternal health care in  
925 sub-Saharan Africa: a systematic review. *Systematic reviews*. 2016;5(1):137.

- 926 30. Yuan B, Målqvist M, Trygg N, Qian X, Ng N, Thomsen S. What interventions are  
927 effective on reducing inequalities in maternal and child health in low-and middle-income  
928 settings? A systematic review. *BMC public health*. 2014;14(1):634.
- 929 31. Madon T, Hofman KJ, Kupfer L, Glass RI. *Implementation science*. American  
930 Association for the Advancement of Science; 2007.
- 931 32. Mathai M, Dilip TR, Jawad I, Yoshida S. Strengthening accountability to end preventable  
932 maternal deaths. *International Journal of Gynecology & Obstetrics*. 2015;131:S3-S5.
- 933 33. World Health Organization. Trends in maternal mortality: 1990 to 2013. Estimates by  
934 WHO, UNICEF, UNFPA, The World Bank and The United Nations Population Division.  
935 Research DoRH; 2014 2014. Contract No.: 978 92 4 150722 6.
- 936 34. Iroezi ND, Mindry D, Kawale P, Chikowi G, Jansen PA, Hoffman RM. A qualitative  
937 analysis of the barriers and facilitators to receiving care in a prevention of mother-to-  
938 child program in Nkhoma, Malawi. *African journal of reproductive health*.  
939 2014;17(4):118-29.
- 940 35. Nsimba SE, Kayombo EJ. Sociocultural barriers and malaria health care in Tanzania.  
941 *Evaluation & the health professions*. 2008.
- 942 36. Belizán M, Bergh A-M, Cilliers C, Pattinson RC, Voce A. Stages of change: A  
943 qualitative study on the implementation of a perinatal audit programme in South Africa.  
944 *BMC Health Services Research*. 2011;11(1):1.
- 945 37. Kongnyuy EJ, van den Broek N. The difficulties of conducting maternal death reviews in  
946 Malawi. *BMC Pregnancy and Childbirth*. 2008;8(1):42.
- 947 38. Davies P, Walker A, Grimshaw J, editors. *Theories of behaviour change in studies of  
948 guideline implementation*. Proceedings of the British Psychological Society; 2003.
- 949 39. Kitson A, Harvey G, McCormack B. Enabling the implementation of evidence based  
950 practice: a conceptual framework. *BMJ Quality & Safety*. 1998;7(3):149-58.
- 951 40. Michie S, Johnston M, Abraham C, Lawton R, Parker D, Walker A. Making  
952 psychological theory useful for implementing evidence based practice: a consensus  
953 approach. *BMJ Quality & Safety*. 2005;14(1):26-33.
- 954 41. Sales A, Smith J, Curran G, Kochevar L. Models, strategies, and tools. *Journal of general  
955 internal medicine*. 2006;21(2):S43-S9.
- 956 42. Group ICeTBR. Designing theoretically-informed implementation interventions.  
957 *Implementation Science*. 2006;1(1):4.
- 958 43. McEvoy R, Ballini L, Maltoni S, O'Donnell CA, Mair FS, MacFarlane A. A qualitative  
959 systematic review of studies using the normalization process theory to research  
960 implementation processes. *Implement Sci*. 2014;9(2).
- 961 44. Nilsen P. Making sense of implementation theories, models and frameworks.  
962 *Implementation Science*. 2015;10(1):53.
- 963 45. Eccles MP, Armstrong D, Baker R, Cleary K, Davies H, Davies S, et al. An  
964 implementation research agenda. *Implement Sci*. 2009;4(18):1-7.
- 965 46. Forster DA, Newton M, McLachlan HL, Willis K. Exploring implementation and  
966 sustainability of models of care: can theory help? *BMC Public Health*. 2011;11(Suppl  
967 5):S8.
- 968 47. Helfrich CD, Damschroder LJ, Hagedorn HJ, Daggett GS, Sahay A, Ritchie M, et al. A  
969 critical synthesis of literature on the promoting action on research implementation in  
970 health services (PARIHS) framework. *Implement Sci*. 2010;5(1):82.
- 971 48. Milat AJ, Bauman A, Redman S. Narrative review of models and success factors for  
972 scaling up public health interventions. *Implementation Science*. 2015;10(1):113.
- 973 49. Walugembe DR PK, Kaharuza F, Waiswa P, Wylie L, Wathen N, Kothari A. Using  
974 Normalization Process Theory (NPT) to explore implementation of the Maternal

- 975 Perinatal Death Surveillance and Response (MPDSR) Policy in Uganda: A reflection.  
976 Health Research Policy and Systems. Forthcoming 2024.
- 977 50. Walugembe DR. Exploring Variations in the Implementation of a Health Systems Level  
978 Policy to Improve Maternal and Child Health. 2021. Available from:  
979 <https://ir.lib.uwo.ca/etd/8204>.
- 980 51. Nilsen P, Ståhl C, Roback K, Cairney P. Never the twain shall meet?-a comparison of  
981 implementation science and policy implementation research. *Implementation Science*.  
982 2013;8(1):63.
- 983 52. May C, Finch T. Implementing, embedding, and integrating practices: an outline of  
984 normalization process theory. *Sociology*. 2009;43(3):535-54.
- 985 53. May C, Finch T, Mair F, Ballini L, Dowrick C, Eccles M, et al. Understanding the  
986 implementation of complex interventions in health care: the normalization process model.  
987 *BMC Health Services Research*. 2007;7(1):148.
- 988 54. May CR, Cummings A, Girling M, Bracher M, Mair FS, May CM, et al. Using  
989 Normalization Process Theory in feasibility studies and process evaluations of complex  
990 healthcare interventions: a systematic review. *Implementation Science*. 2018;13(1):80.
- 991 55. May CR, Mair F, Finch T, MacFarlane A, Dowrick C, Treweek S, et al. Development of  
992 a theory of implementation and integration: Normalization Process Theory.  
993 *Implementation Science*. 2009;4(1):29.
- 994 56. Merali HS, Lipsitz S, Hevelone N, Gawande AA, Lashoher A, Agrawal P, Spector J.  
995 Audit-identified avoidable factors in maternal and perinatal deaths in low resource  
996 settings: a systematic review. *BMC pregnancy and childbirth*. 2014;14(1):280.
- 997 57. Mills S, Lewis G, Say L, Mathews M, Okwero P. Maternal Death Audit as a Tool  
998 Reducing Maternal Mortality. *Health Nutrition and Population Notes World Bank*,  
999 Washington DC. 2011.
- 1000 58. Lewis G. Reviewing maternal deaths to make pregnancy safer. *Best Practice & Research*  
1001 *Clinical Obstetrics & Gynaecology*. 2008;22(3):447-63.
- 1002 59. World Health Organization. Beyond the numbers: reviewing maternal deaths and  
1003 complications to make pregnancy safer. 2004. Geneva: WHO Google Scholar. 2011.
- 1004 60. Smith H, Ameh C, Roos N, Mathai M, van den Broek N. Implementing maternal death  
1005 surveillance and response: a review of lessons from country case studies. *BMC*  
1006 *Pregnancy and Childbirth*. 2017;17(1):1-11.
- 1007 61. Willcox ML, Okello IA, Maidwell-Smith A, Tura AK, van den Akker T, Knight M.  
1008 Maternal and perinatal death surveillance and response: a systematic review of qualitative  
1009 studies. *Bulletin of the World Health Organization*. 2023;101(1):62.
- 1010 62. Armstrong C, Lange I, Magoma M, Ferla C, Filippi V, Ronsmans C. Strengths and  
1011 weaknesses in the implementation of maternal and perinatal death reviews in Tanzania:  
1012 perceptions, processes and practice. *Tropical medicine & international health*.  
1013 2014;19(9):1087-95.
- 1014 63. Biswas A, Rahman F, Eriksson C, Halim A, Dalal K. Facility Death Review of Maternal  
1015 and Neonatal Deaths in Bangladesh. *PLoS One*. 2015;10(11):e0141902.
- 1016 64. Dumont A, Tourigny C, Fournier P. Improving obstetric care in low-resource settings:  
1017 implementation of facility-based maternal death reviews in five pilot hospitals in Senegal.  
1018 *Hum Resour Health*. 2009;7(61):S23.
- 1019 65. Hilber AM, Blake C, Bohle LF, Bandali S, Agbon E, Hulton L. Strengthening  
1020 accountability for improved maternal and newborn health: A mapping of studies in Sub-  
1021 Saharan Africa. *International Journal of Gynecology & Obstetrics*. 2016;135(3):345-57.
- 1022 66. Pattinson R, Kerber K, Waiswa P, Day LT, Mussell F, Asiruddin S, et al. Perinatal  
1023 mortality audit: counting, accountability, and overcoming challenges in scaling up in

- 1024 low and middle income countries. *International Journal of Gynecology & Obstetrics*.  
1025 2009;107(Supplement):S113-S22.
- 1026 67. Pearson L, Shoo R. Maternal death review in Africa. *International Journal of Gynecology*  
1027 & *Obstetrics*. 2009;106(1):89-94.
- 1028 68. Sayinzoga F, Bijlmakers L, van Dillen J, Mivumbi V, Ngabo F, van der Velden K.  
1029 Maternal death audit in Rwanda 2009–2013: a nationwide facility-based retrospective  
1030 cohort study. *BMJ Open*. 2016;6(1):e009734.
- 1031 69. World Health Organization. Maternal Death Surveillance and Response - progress 2017  
1032 [Available from:  
1033 [https://www.who.int/maternal\\_child\\_adolescent/epidemiology/maternal-death-](https://www.who.int/maternal_child_adolescent/epidemiology/maternal-death-surveillance/progress/en/)  
1034 [surveillance/progress/en/](https://www.who.int/maternal_child_adolescent/epidemiology/maternal-death-surveillance/progress/en/).
- 1035 70. Kinney MV, Ajayi G, de Graft-Johnson J, Hill K, Khadka N, Om’Iniabohs A, et al. “It  
1036 might be a statistic to me, but every death matters.”: An assessment of facility-level  
1037 maternal and perinatal death surveillance and response systems in four sub-Saharan  
1038 African countries. *PLoS One*. 2020;15(12):e0243722.
- 1039 71. Uganda Bureau of Statistics. The Uganda demographic and health survey 2022. In:  
1040 Uganda Bureau of Statistics, editor. Kampala,2022.
- 1041 72. Ministry of Health. National Annual Maternal and Perinatal Death Surveillance and  
1042 Response (MPDSR) Report FY 2022/2023. Kampala2023.
- 1043 73. Ministry of Health. Maternal and Perinatal Death Surveillance and Response Guidelines.  
1044 In: Division RH, editor. Kampala2017.
- 1045 74. Ministry of Health. Maternal & Perinatal Death Review. 2011.
- 1046 75. Namagembe I, Kiwanuka N, Byamugisha JK, Ononge S, Beyeza-Kashesya J, Kaye DK,  
1047 et al. Why mothers die at a busy tertiary urban hospital in Kampala, Uganda: a  
1048 comprehensive review of maternal deaths 2016-2018 and implications for quality  
1049 improvement to reduce deaths. *African Health Sciences*. 2022;22(2):489-99.
- 1050 76. Masereka EM, Naturinda A, Tumusiime A, Munguiko C. Implementation of the Perinatal  
1051 Death Surveillance and Response guidelines: Lessons from annual health system  
1052 strengthening interventions in the Rwenzori Sub-Region, Western Uganda. *Nursing*  
1053 *Open*. 2020;7(5):1497-505.
- 1054 77. Sensalire S, Isabirye P, Karamagi E, Byabagambi J, Rahimzai M, Calnan J. Saving  
1055 mothers, giving life approach for strengthening health systems to reduce maternal and  
1056 newborn deaths in 7 scale-up districts in northern Uganda. *Global Health: Science and*  
1057 *Practice*. 2019;7(Supplement 1):S168-S87.
- 1058 78. Agaro C, Beyeza-Kashesya J, Waiswa P, Sekandi JN, Tusiime S, Anguzu R, Kiracho EE.  
1059 The conduct of maternal and perinatal death reviews in Oyam District, Uganda: a  
1060 descriptive cross-sectional study. *BMC women's health*. 2016;16(1):38.
- 1061 79. Merriam SB. *Qualitative Research and Case Study Applications in Education. Revised*  
1062 *and Expanded from " Case Study Research in Education."*: ERIC; 1998.
- 1063 80. Stake RE. *The art of case study research*: Sage; 1995.
- 1064 81. Bhattacharya K. *Fundamentals of qualitative research: A practical guide*: Routledge;  
1065 2017.
- 1066 82. Pilarska J. The constructivist paradigm and phenomenological qualitative research  
1067 design. *Research paradigm considerations for emerging scholars*. 2021:64-83.
- 1068 83. KirungaTashobya C, Ssengooba F, Nabyonga-Orem J, Bataringaya J, Macq J, Marchal B,  
1069 et al. A critique of the Uganda district league table using a normative health system  
1070 performance assessment framework. *BMC health services research*. 2018;18:1-17.
- 1071 84. Ministry of Health. Annual health sector performance report 2003-2004. Report. 2004  
1072 2004.



- 1073 85. Patton MQ. Designing qualitative studies. *Qualitative research and evaluation methods*.  
1074 2002;3:230-46.
- 1075 86. May CR, Finch T, Ballini L, MacFarlane A, Mair F, Murray E, et al. Evaluating complex  
1076 interventions and health technologies using normalization process theory: development of  
1077 a simplified approach and web-enabled toolkit. *BMC Health Services Research*.  
1078 2011;11(1):245.
- 1079 87. Gallacher K, May CR, Montori VM, Mair FS. Understanding patients' experiences of  
1080 treatment burden in chronic heart failure using normalization process theory. *The Annals*  
1081 *of Family Medicine*. 2011;9(3):235-43.
- 1082 88. Boyatzis RE. *Transforming qualitative information: Thematic analysis and code*  
1083 *development*: sage; 1998.
- 1084 89. Polit D. F. & Beck, C., T.(2012). *Nursing research: Generating and assessing evidence*  
1085 *for nursing practice*. 2012;9.
- 1086 90. Le Compte M, Preissle J. *Educational Ethnography and qualitative design research*. San  
1087 *Diego: Academic Press, Inc; 1993*.
- 1088 91. Abouchadi S, Zhang W-H, De Brouwere V. Underreporting of deaths in the maternal  
1089 deaths surveillance system in one region of Morocco. *PLoS One*. 2018;13(1):e0188070.
- 1090 92. Plamondon KM, Bisung E. The CCGHR Principles for Global Health Research:  
1091 Centering equity in research, knowledge translation, and practice. *Social science &*  
1092 *medicine*. 2019;239:112530.
- 1093 93. Compaoré R, Kouanda S, Kuma Aboagye P, Sagoe Moses I, Brew G, Deganus S, et al.  
1094 Transitioning to the maternal death surveillance and response system from maternal death  
1095 review in Ghana: challenges and lessons learned. *International Journal of Gynecology &*  
1096 *Obstetrics*. 2022;158:37-45.
- 1097 94. Congo B, Sanon D, Millogo T, Ouedraogo CM, Yaméogo WME, Meda ZC, Kouanda S.  
1098 Inadequate programming, insufficient communication and non-compliance with the basic  
1099 principles of maternal death audits in health districts in Burkina Faso: a qualitative study.  
1100 *Reproductive Health*. 2017;14:1-11.
- 1101 95. Hofman JJ, Mohammed H. Experiences with facility-based maternal death reviews in  
1102 northern Nigeria. *International Journal of Gynecology & Obstetrics*. 2014;126(2):111-4.
- 1103 96. Chirwa MD, Nyasulu J, Modiba L, Limando MG-. Challenges faced by midwives in the  
1104 implementation of facility-based maternal death reviews in Malawi. *BMC pregnancy and*  
1105 *childbirth*. 2023;23(1):282.
- 1106 97. Thorsen VC, Sundby J, Meguid T. Easier said than done!: methodological challenges  
1107 with conducting maternal death review research in Malawi. *BMC Medical Research*  
1108 *Methodology*. 2014;14(1):1.
- 1109 98. Walugembe DR, Sibbald S, Le Ber MJ, Kothari A. Sustainability of public health  
1110 interventions: where are the gaps? *Health research policy and systems*. 2019;17(1):1-7.
- 1111 99. Guba EG, Lincoln YS. *Effective evaluation: Improving the usefulness of evaluation*  
1112 *results through responsive and naturalistic approaches*: Jossey-Bass; 1981.
- 1113
- 1114
